# Supplementary material
Source: PubMed Central journal article supplement (PMC4853295)
Supplement: NIHMS735006-supplement.pdf [file NIHMS735006-supplement.pdf]

# Neural Connectivity Evidence for a Categorical-Dimensional Hybrid Model of Autism Spectrum Disorder

## Supplemental Information

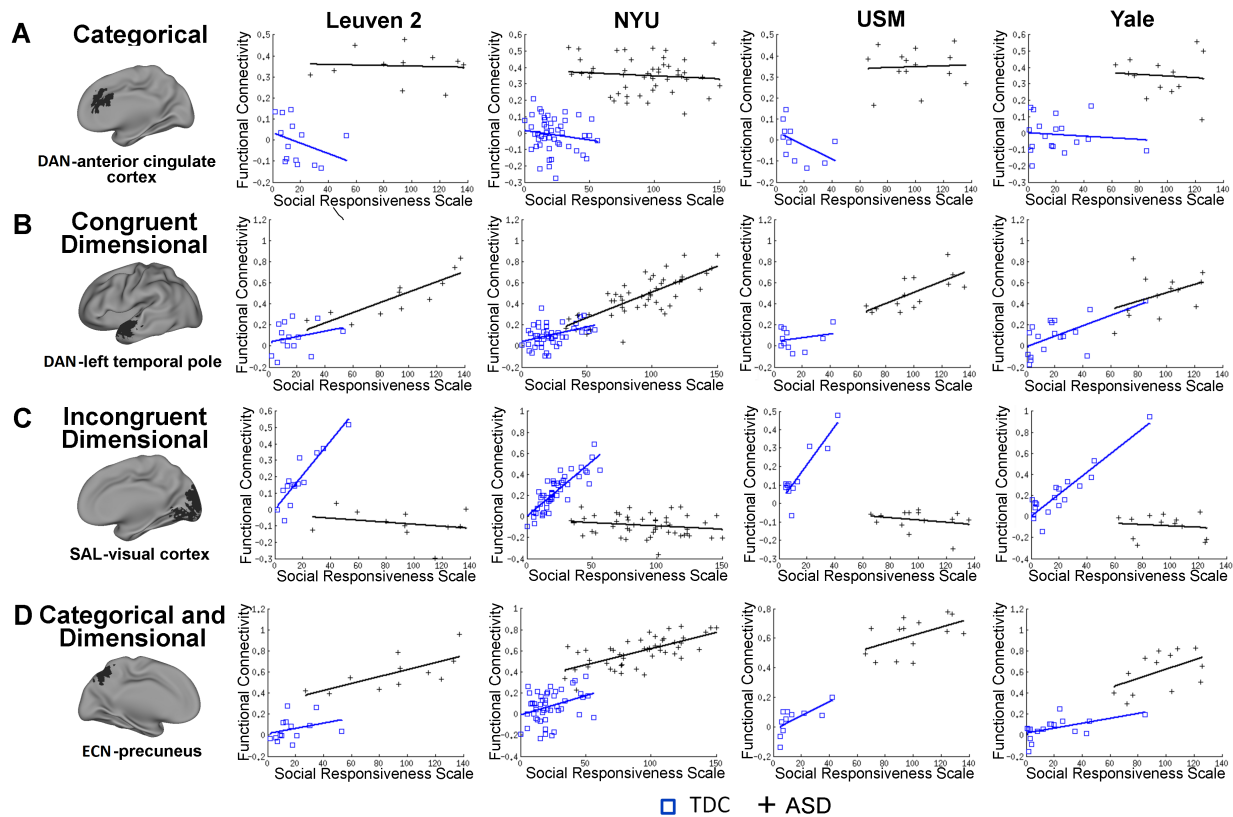

**Figure S1.** Scatter plots depicting the site-specific relationships between SRS scores and functional connectivity for TDC and ASD groups for selected regions. Least-squares fit lines are plotted for TDC and ASD separately for each of the four sites demonstrating (A) categorical effects only, (B) dimensional effects only, (C) an interaction of categorical and dimensional effects, and (D) both dimensional and categorical effects. Plotted functional connectivity values represent residuals after removing nuisance effects as described in the main text. DAN, dorsal attention network; DMN, default mode network; SAL, salience network; ECN, executive control network; NYU, New York University; USM, Utah School of Medicine.

**Table S1.** Resting-state fMRI scan parameters by site.

|                               | <b>Leuven</b>   | <b>NYU</b>  | <b>USM</b>    | <b>Yale</b>   |
|-------------------------------|-----------------|-------------|---------------|---------------|
| Scan Duration                 | 6:40            | 6:00        | 8:06          | 6:40          |
| TR (ms)                       | 1667            | 2000        | 2000          | 2000          |
| TE (ms)                       | 33              | 15          | 28            | 25            |
| Flip Angle (°)                | 90              | 90          | 90            | 60            |
| Voxel Size (mm <sup>3</sup> ) | 3.59 x 3.59 x 4 | 3 x 3 x 4   | 3.4 x 3.4 x 3 | 3.4 x 3.4 x 4 |
| Slices                        | 32              | 33          | 40            | 34            |
| FOV (mm <sup>2</sup> )        | 230 x 230       | 240 x 192   | 220 x 220     | 220 x 220     |
| Acquisition Sequence          | ascending       | interleaved | interleaved   | interleaved   |

TR, repetition time; TE, echo time; FOV, field of view; mm, millimeters; ASD, autism spectrum disorder; NYU, New York University; USM, Utah School of Medicine.

**Table S2.** Congruent dimensional effects of ASD symptoms (i.e., SRS score).

|                                                     | BA     | x   | y   | z   | # Voxels | Direction |
|-----------------------------------------------------|--------|-----|-----|-----|----------|-----------|
| <b>DA</b>                                           |        |     |     |     |          |           |
| medial frontal gyrus                                | 8      | 9   | 54  | 45  | 509      | +         |
| R middle/superior temporal gyrus                    | 21/22  | 69  | -39 | 9   | 179      | +         |
| L middle temporal gyrus                             | 21     | -66 | -30 | -6  | 177      | +         |
| R putamen, thalamus                                 |        | 12  | -69 | -36 | 347      | -         |
| L putamen                                           |        | -21 | 0   | 3   | 176      | -         |
| <b>DM</b>                                           |        |     |     |     |          |           |
| R insula/precentral gyrus                           | 13, 44 | 45  | -3  | 21  | 191      | +         |
| R inferior frontal gyrus                            | 45     | 48  | 30  | 9   | 145      | +         |
| R precentral gyrus                                  | 6      | 36  | 3   | 27  | 91       | +         |
| <b>SAL</b>                                          |        |     |     |     |          |           |
| precuneus                                           | 7      | -15 | -66 | 33  | 361      | +         |
| R lingual gyrus                                     | 19     | 27  | -72 | 0   | 146      | +         |
| posterior cingulate cortex                          | 29, 30 | -3  | -48 | 21  | 138      | +         |
| <b>CON</b>                                          |        |     |     |     |          |           |
| medial frontal gyrus                                | 8      | 6   | 30  | 48  | 250      | +         |
| L middle frontal gyrus                              | 10     | -36 | 60  | 12  | 161      | +         |
| R lingual gyrus                                     | 18     | 39  | -93 | -3  | 156      | +         |
| R middle frontal gyrus                              | 8      | 38  | 28  | 42  | 113      | +         |
| posterior cingulate cortex                          | 29     | 0   | -39 | 21  | 100      | +         |
| R postcentral gyrus, inferior frontal gyrus, insula | 40, 13 | 53  | -29 | 45  | 747      | -         |
| R precentral gyrus                                  | 4      | 24  | -21 | 65  | 307      | -         |
| L precuneus, superior parietal lobule               | 7      | -24 | -54 | 36  | 142      | -         |

Coordinates reported in Montreal Neurological Institute (MNI) standard space.

L, left; R, right; BA, Brodmann area; DA, dorsal attention network; DM, default mode network; SAL, salience processing network; CON, executive control network; ASD, autism spectrum disorder; TDC, typically-developing children.

“+”: positive relationships; “-”: negative relationships.

**Table S3.** Categorical differences in functional connectivity values associated with an ASD diagnosis but not explained by ASD-related symptom severity (i.e., SRS score).

|                                          | BA     | x   | y   | z   | # Voxels | Contrast  |
|------------------------------------------|--------|-----|-----|-----|----------|-----------|
| <b>DA</b>                                |        |     |     |     |          |           |
| L, R precuneus                           | 7      | -15 | -75 | 48  | 673      | ASD > TDC |
| L, R cerebellum                          |        | 12  | -69 | -36 | 523      | ASD > TDC |
| R middle frontal, precentral gyrus       | 6      | 39  | -3  | 36  | 266      | ASD > TDC |
| R cerebellum                             |        | 21  | -51 | -18 | 110      | ASD > TDC |
| L inferior parietal lobule               | 40     | -36 | -48 | 45  | 110      | ASD > TDC |
| L superior temporal gyrus, angular gyrus | 41, 39 | -48 | -33 | 12  | 706      | TDC > ASD |
| L middle/medial frontal gyrus            | 9, 10  | -21 | 60  | 18  | 517      | TDC > ASD |
| L superior frontal gyrus                 | 6      | -9  | 21  | 60  | 188      | TDC > ASD |
| L middle/superior temporal gyrus         | 21, 22 | -54 | 6   | -33 | 151      | TDC > ASD |
| R superior temporal gyrus                | 22     | 60  | -15 | 3   | 144      | TDC > ASD |
| R precentral gyrus                       | 4      | 36  | -18 | 57  | 142      | TDC > ASD |
| L fusiform gyrus                         | 37     | -45 | -48 | -15 | 115      | TDC > ASD |
| R medial frontal gyrus                   | 10     | 18  | 42  | 12  | 98       | TDC > ASD |
| R superior frontal gyrus                 | 9      | 18  | 51  | 27  | 98       | TDC > ASD |
| <b>DM</b>                                |        |     |     |     |          |           |
| L supramarginal gyrus                    | 40     | -30 | -48 | 36  | 328      | ASD > TDC |
| R superior/middle frontal gyrus          | 9, 46  | 45  | 42  | 30  | 319      | ASD > TDC |
| L middle frontal gyrus                   | 9, 45  | -36 | 33  | 21  | 273      | ASD > TDC |
| R insula, precentral gyrus               | 13, 44 | 48  | 6   | 6   | 177      | ASD > TDC |
| R inferior parietal lobule               | 40     | 60  | -36 | 21  | 105      | ASD > TDC |
| <b>SAL</b>                               |        |     |     |     |          |           |
| anterior cingulate cortex                | 32     | -6  | 6   | 42  | 169      | ASD > TDC |
| L postcentral gyrus                      | 3      | -45 | -18 | 57  | 192      | TDC > ASD |
| R medial frontal gyrus                   | 6      | 12  | -21 | 54  | 158      | TDC > ASD |
| L middle frontal gyrus                   | 10     | -27 | 60  | 6   | 98       | TDC > ASD |
| <b>CON</b>                               |        |     |     |     |          |           |
| L cerebellum                             |        | -12 | -59 | 40  | 300      | ASD > TDC |
| R superior frontal gyrus                 | 10     | 21  | 45  | 24  | 150      | TDC > ASD |
| L middle frontal gyrus                   | 9      | -27 | 36  | 36  | 135      | TDC > ASD |
| R precentral gyrus                       | 44     | 48  | 6   | 9   | 126      | TDC > ASD |
| L postcentral gyrus                      | 3      | -57 | -21 | 39  | 110      | TDC > ASD |
| medial frontal gyrus                     | 10     | 3   | 57  | 18  | 101      | TDC > ASD |

Coordinates reported in Montreal Neurological Institute (MNI) standard space.

L, left; R, right; BA, Brodmann area; DA, dorsal attention network; DM, default mode network; SAL, salience processing network; CON, executive control network; ASD, autism spectrum disorder; TDC, typically-developing children.

**Table S4.** Significant categorical-by-dimensional interaction effects of ASD.

|                                          | BA | x   | y   | z   | # Voxels | Direction |
|------------------------------------------|----|-----|-----|-----|----------|-----------|
| DA                                       |    |     |     |     |          |           |
| anterior cingulate cortex                | 32 | -9  | 15  | 42  | 211      | +         |
| L parahippocampal gyrus, insula          | 21 | -39 | -6  | 9   | 156      | +         |
| Thalamus                                 |    | 11  | -24 | 8   | 147      | +         |
| R cerebellum                             |    | 27  | -48 | -30 | 141      | +         |
| L caudate                                |    | -15 | 3   | 24  | 98       | +         |
| posterior cingulate cortex               | 23 | 6   | -54 | 18  | 175      | -         |
| R precentral gyrus                       | 4  | 30  | -27 | 58  | 151      | -         |
| L middle temporal gyrus                  | 21 | -51 | 3   | -33 | 120      | -         |
| R middle temporal gyrus                  | 20 | 54  | -36 | 9   | 98       | -         |
| DM                                       |    |     |     |     |          |           |
| R parahippocampal gyrus                  |    | 21  | -3  | -9  | 180      | +         |
| R middle frontal gyrus                   | 10 | 42  | 42  | -6  | 154      | +         |
| R inferior frontal gyrus                 | 45 | 46  | 22  | 18  | 97       | +         |
| L superior frontal gyrus                 | 9  | -39 | 45  | 30  | 97       | +         |
| L precuneus                              | 7  | -12 | -63 | 36  | 152      | -         |
| L superior temporal gyrus                | 22 | -45 | -56 | 16  | 112      | -         |
| SAL                                      |    |     |     |     |          |           |
| L insula                                 | 13 | -30 | 9   | 12  | 190      | +         |
| L, R superior frontal gyrus              | 8  | 6   | 18  | 51  | 125      | +         |
| L middle occipital gyrus                 | 18 | -30 | -90 | 13  | 106      | +         |
| precuneus                                | 7  | -9  | -63 | 45  | 576      | -         |
| precuneus                                | 31 | -3  | -69 | 18  | 106      | -         |
| R angular gyrus                          | 39 | 41  | -56 | 30  | 104      | -         |
| CON                                      |    |     |     |     |          |           |
| R cerebellum                             |    | 36  | -69 | -33 | 250      | +         |
| L middle frontal gyrus, precentral gyrus | 6  | -42 | -15 | 60  | 150      | +         |

Coordinates reported in Montreal Neurological Institute (MNI) standard space.

L, left; R, right; BA, Brodmann area; DA, dorsal attention network; DM, default mode network; SAL, salience processing network; CON, executive control network; ASD, autism spectrum disorder; TDC, typically-developing children.

“+” indicates those regions for which the relationship between functional connectivity and symptoms was increased in slope (i.e., either become more positive or change from negative to positive) for ASD versus TDC. “-” indicates regions with a decrease in slope (i.e., either become more negative or change from positive to negative) relationship between functional connectivity and symptoms for ASD versus TDC.
